# Supplementary material
Source: MDPI journal article supplement (https://www.mdpi.com/2072-4292/12/4/728)
Supplement: s1 [file s1]

# MDPI Publications

*Remote Sensing*

Supporting Information for

**Infrasound observations of atmospheric disturbances due to a sequence of explosive eruptions at Mt. Shinmoedake, Japan, in March**

Mario Batubara<sup>1,2</sup>, Masa-yuki Yamamoto<sup>1</sup>, and Hiroaki Saito<sup>1</sup>

<sup>1</sup>School of System Engineering, Kochi University of Technology, Kochi, Japan.

<sup>2</sup>Space Science Center, Indonesian National Institute of Aeronautics and Space, Bandung, Indonesia

## Contents of this file

Tables S1 to S7

## Introduction

Additional explanations related to the picture and table below are as follows:

- List of Infrasound Stations Operated since 2015 (Table S1);
- Specifications of the infrasound instrument (ADXII-INF01) (Table S2).
- A result set for trace velocity, sound speed and winds speed during sequence of eruption (Table S3-S7).

| Station Code | Latitude (°N) | Longitude (°E) | Station Code | Latitude (°N) | Longitude (°E) |
|--------------|---------------|----------------|--------------|---------------|----------------|
| KUT00        | 33.6099       | 133.6916       | KUT16        | 33.2680       | 134.1641       |
| KUT01        | 33.0363       | 133.0311       | KUT17        | 33.5278       | 133.7576       |
| KUT02        | 33.0547       | 133.0461       | KUT19        | 42.6022       | 141.4797       |
| KUT03        | 33.0405       | 133.0563       | KUT20        | 42.4988       | 143.4325       |
| KUT04        | 32.9852       | 132.9988       | KUT21        | 41.9361       | 143.2408       |
| KUT05        | 33.0413       | 132.9713       | KUT30        | 34.9650       | 136.6244       |
| KUT06        | 35.7158       | 139.9441       | KUT31        | 33.8883       | 136.1000       |
| KUT07        | 32.9055       | 132.7180       | KUT32        | 34.0705       | 136.1908       |
| KUT08        | 32.7319       | 133.0186       | KUT33        | 34.4875       | 136.7091       |
| KUT09        | 32.4315       | 133.0186       | KUT34        | 34.7691       | 137.3913       |
| KUT10        | 32.7322       | 132.9944       | KUT35        | 34.6001       | 138.2244       |
| KUT11        | 33.4510       | 133.4417       | KUT40        | 33.5709       | 131.2193       |
| KUT12        | 33.5061       | 133.5111       | KUT41        | 33.2844       | 131.4873       |
| KUT13        | 33.5653       | 133.6673       | KUT51        | 35.9657       | 140.6448       |
| KUT14        | 33.5033       | 133.8794       | KUT53        | 34.9848       | 139.8574       |
| KUT15        | 33.5243       | 134.2809       | KUT60        | 39.1949       | 141.8291       |

**Table S1. List of Infrasound Stations Operated since 2015.**

| <b>Integrated Accelerometer</b>  |                                                                                                                       |
|----------------------------------|-----------------------------------------------------------------------------------------------------------------------|
| <b>Measurement range</b>         | 0–3347 Gal                                                                                                            |
| <b>Frequency characteristics</b> | 0.034–1600 Hz (N-S E-W), 0.034–550 Hz (V)                                                                             |
| <b>Resolution</b>                | 16 bit                                                                                                                |
| <b>Audible Noise Sensor</b>      |                                                                                                                       |
| <b>Measurement range</b>         | 43–110 dB                                                                                                             |
| <b>Frequency characteristics</b> | 10–1,000 Hz                                                                                                           |
| <b>Auditory correction</b>       | None (= V characteristics)                                                                                            |
| <b>Time constant</b>             | 630 ms                                                                                                                |
| <b>Resolution</b>                | 16 bit                                                                                                                |
| <b>Infrasound Sensor</b>         |                                                                                                                       |
| <b>Measurement range</b>         | $\pm 2.422$ kPa                                                                                                       |
| <b>Minimum resolution</b>        | 0.577 mPa                                                                                                             |
| <b>Noise level</b>               | $\pm 20$ mPa (Reduced to $\pm 1$ mPa after passing through the 64th moving average filter)                            |
| <b>D range</b>                   | 143.2 dB                                                                                                              |
| <b>Frequency characteristics</b> | 0.001 Hz to 6.25 Hz ( $\pm 6$ dB temperature change low)<br>0.004 Hz to 6.25 Hz ( $\pm 6$ dB temperature change high) |
| <b>Pressure Sensor</b>           |                                                                                                                       |
| <b>Measurement range</b>         | 15–115 kPa                                                                                                            |
| <b>Frequency range</b>           | The lower of DC to 1 Hz or $F_s/2$ ( $F_s$ = sampling frequency)                                                      |
| <b>Resolution</b>                | 16 bit                                                                                                                |
| <b>Temperature Sensor</b>        |                                                                                                                       |
| <b>Measurement range</b>         | 0–81.92°C                                                                                                             |
| <b>Minimum resolution</b>        | 0.0000390625°C                                                                                                        |
| <b>D range</b>                   | 128.18 dB                                                                                                             |

Table S2. Specifications of the infrasound instrument (ADXII-INF01).

| <b>trace velocity<br/>(km/s)</b> | <b>computed reflecting<br/>level (km)</b> | <b>speed of sound at<br/>reflecting level (km/s)</b> | <b>computed wind at<br/>reflecting level (m/s)</b> |
|----------------------------------|-------------------------------------------|------------------------------------------------------|----------------------------------------------------|
| <b>0.335</b>                     | 1.43992                                   | 0.325277818                                          | 9.722182119                                        |
| <b>0.335</b>                     | 1.51663                                   | 0.325274685                                          | 9.725315545                                        |
| <b>0.335</b>                     | 1.59605                                   | 0.325195798                                          | 9.804202034                                        |
| <b>0.335</b>                     | 1.6845                                    | 0.325160057                                          | 9.83994316                                         |
| <b>0.335</b>                     | 1.83236                                   | 0.325626272                                          | 9.373727642                                        |
| <b>0.3732</b>                    | 10.8367                                   | 0.316632885                                          | 56.56711539                                        |
| <b>0.3732</b>                    | 10.9657                                   | 0.315654214                                          | 57.54578584                                        |
| <b>0.3732</b>                    | 37.3657                                   | 0.30178093                                           | 71.41907002                                        |
| <b>0.3732</b>                    | 37.5416                                   | 0.298794697                                          | 74.40530354                                        |
| <b>0.3732</b>                    | 37.7365                                   | 0.297129246                                          | 76.07075431                                        |
| <b>0.3732</b>                    | 37.9515                                   | 0.295760593                                          | 77.43940752                                        |
| <b>0.3732</b>                    | 38.1866                                   | 0.294541827                                          | 78.65817264                                        |
| <b>0.3732</b>                    | 38.4431                                   | 0.293433228                                          | 79.76677169                                        |
| <b>0.3732</b>                    | 38.7222                                   | 0.292411739                                          | 80.78826056                                        |
| <b>0.3732</b>                    | 39.0255                                   | 0.291471553                                          | 81.7284467                                         |
| <b>0.3732</b>                    | 39.3568                                   | 0.290626862                                          | 82.57313816                                        |
| <b>0.3732</b>                    | 39.7272                                   | 0.289967581                                          | 83.23241873                                        |
| <b>0.3732</b>                    | 40.1652                                   | 0.289709429                                          | 83.49057104                                        |
| <b>0.3732</b>                    | 40.7612                                   | 0.290648088                                          | 82.55191233                                        |
| <b>0.3732</b>                    | 42.1918                                   | 0.297878168                                          | 75.32183238                                        |
| <b>0.3732</b>                    | 43.5031                                   | 0.296536556                                          | 76.66344415                                        |
| <b>0.3732</b>                    | 44.357                                    | 0.294886571                                          | 78.31342954                                        |
| <b>0.3732</b>                    | 45.1104                                   | 0.293690615                                          | 79.50938464                                        |
| <b>0.3732</b>                    | 45.9062                                   | 0.293385329                                          | 79.81467132                                        |
| <b>0.3732</b>                    | 46.9604                                   | 0.295442497                                          | 77.75750315                                        |

Table S3. Trace velocity, sound speed and winds speed for March 10<sup>th</sup> 2018 at 01:54 JST.

| trace velocity<br>(km/s) | computed reflecting<br>level (km) | speed of sound at<br>reflecting level (km/s) | computed wind at<br>reflecting level (m/s) |
|--------------------------|-----------------------------------|----------------------------------------------|--------------------------------------------|
| 0.3348                   | 1.42946                           | 0.325598916                                  | 9.201084137                                |
| 0.3348                   | 1.49758                           | 0.325690738                                  | 9.109262193                                |
| 0.3348                   | 1.5636                            | 0.325576043                                  | 9.223957085                                |
| 0.3348                   | 1.62898                           | 0.325484421                                  | 9.315579014                                |
| 0.3348                   | 1.71553                           | 0.325607258                                  | 9.192741898                                |
| 0.3796                   | 38.0356                           | 0.304693914                                  | 74.90608578                                |
| 0.3796                   | 38.1918                           | 0.302572334                                  | 77.02766643                                |
| 0.3796                   | 38.3599                           | 0.300978453                                  | 78.62154739                                |
| 0.3796                   | 38.5411                           | 0.299556019                                  | 80.0439815                                 |
| 0.3796                   | 38.738                            | 0.298241732                                  | 81.35826769                                |
| 0.3796                   | 38.9547                           | 0.297028054                                  | 82.57194622                                |
| 0.3796                   | 39.1986                           | 0.295935128                                  | 83.66487235                                |
| 0.3796                   | 39.48                             | 0.294998002                                  | 84.60199795                                |
| 0.3796                   | 39.81                             | 0.294245979                                  | 85.35402063                                |
| 0.3796                   | 40.2037                           | 0.293754432                                  | 85.84556846                                |
| 0.3796                   | 40.6963                           | 0.293704736                                  | 85.89526412                                |
| 0.3796                   | 41.348                            | 0.294328155                                  | 85.27184474                                |
| 0.3796                   | 42.0873                           | 0.294463136                                  | 85.136864                                  |
| 0.3796                   | 42.7167                           | 0.293427926                                  | 86.17207369                                |
| 0.3796                   | 43.2545                           | 0.292187302                                  | 87.41269842                                |
| 0.3796                   | 43.7704                           | 0.291113614                                  | 88.48638648                                |
| 0.3796                   | 44.3047                           | 0.290312404                                  | 89.28759629                                |
| 0.3796                   | 44.8942                           | 0.289979343                                  | 89.62065746                                |
| 0.3796                   | 45.6459                           | 0.290964984                                  | 88.63501621                                |
| 0.3796                   | 65.1122                           | 0.31464418                                   | 64.95581989                                |
| 0.3796                   | 65.8016                           | 0.308333807                                  | 71.2661928                                 |

Table S4. Trace velocity, sound speed and winds speed for March 10th 2018 at 04:27 JST.

| trace velocity<br>(km/s) | computed reflecting<br>level (km) | speed of sound at<br>reflecting level (km/s) | computed wind at<br>reflecting level (m/s) |
|--------------------------|-----------------------------------|----------------------------------------------|--------------------------------------------|
| 0.3594                   | 39.9089                           | 0.290542614                                  | 68.85738557                                |
| 0.3594                   | 40.1616                           | 0.28944729                                   | 69.95270985                                |
| 0.3594                   | 40.4331                           | 0.288431978                                  | 70.96802162                                |
| 0.3594                   | 40.7267                           | 0.28749141                                   | 71.90858995                                |
| 0.3594                   | 41.044                            | 0.286626235                                  | 72.77376492                                |
| 0.3594                   | 41.3926                           | 0.285874717                                  | 73.52528343                                |
| 0.3594                   | 41.7801                           | 0.285279684                                  | 74.12031628                                |
| 0.3594                   | 42.2209                           | 0.284937343                                  | 74.46265693                                |
| 0.3594                   | 42.7487                           | 0.285056852                                  | 74.34314806                                |
| 0.3594                   | 43.4134                           | 0.28588417                                   | 73.51583016                                |
| 0.3594                   | 44.2833                           | 0.287671768                                  | 71.72823158                                |
| 0.3594                   | 45.528                            | 0.291667995                                  | 67.73200548                                |
| 0.3594                   | 62.2862                           | 0.315529086                                  | 43.8709137                                 |

Table S5. Trace velocity, sound speed and winds speed for March 10th 2018 at 10:15 JST.

| trace velocity<br>(km/s) | computed reflecting<br>level (km) | speed of sound at<br>reflecting level (km/s) | computed wind at<br>reflecting level (m/s) |
|--------------------------|-----------------------------------|----------------------------------------------|--------------------------------------------|
| 0.3679                   | 10.7776                           | 0.328495285                                  | 39.40471505                                |
| 0.3679                   | 10.8273                           | 0.327257281                                  | 40.6427195                                 |
| 0.3679                   | 10.8826                           | 0.326234093                                  | 41.66590702                                |
| 0.3679                   | 10.944                            | 0.32522469                                   | 42.67530961                                |
| 0.3679                   | 11.0124                           | 0.324216955                                  | 43.68304501                                |
| 0.3679                   | 11.0891                           | 0.323211611                                  | 44.68838862                                |
| 0.3679                   | 11.1755                           | 0.322242417                                  | 45.65758303                                |
| 0.3679                   | 11.275                            | 0.321332908                                  | 46.56709184                                |
| 0.3679                   | 11.3911                           | 0.32053109                                   | 47.36890986                                |
| 0.3679                   | 11.5293                           | 0.319916338                                  | 47.98366224                                |
| 0.3679                   | 11.7023                           | 0.319664811                                  | 48.23518875                                |
| 0.3679                   | 11.941                            | 0.320333731                                  | 47.56626937                                |
| 0.3679                   | 46.2706                           | 0.309988674                                  | 57.91132581                                |

Table S6. Trace velocity, sound speed and winds speed for March 12th 2018 at 12:45 JST.

| trace velocity<br>(km/s) | computed reflecting<br>level (km) | speed of sound at<br>reflecting level (km/s) | computed wind at<br>reflecting level (m/s) |
|--------------------------|-----------------------------------|----------------------------------------------|--------------------------------------------|
| 0.3785                   | 1.5892                            | 0.342010153                                  | 36.48984751                                |
| 0.3785                   | 10.3707                           | 0.335842021                                  | 42.65797922                                |
| 0.3785                   | 10.4181                           | 0.334839063                                  | 43.66093753                                |
| 0.3785                   | 10.4699                           | 0.333887805                                  | 44.61219511                                |
| 0.3785                   | 10.5263                           | 0.332931442                                  | 45.56855832                                |
| 0.3785                   | 10.5871                           | 0.331952358                                  | 46.54764164                                |
| 0.3785                   | 10.6526                           | 0.330949705                                  | 47.55029519                                |
| 0.3785                   | 10.7234                           | 0.329921699                                  | 48.57830113                                |
| 0.3785                   | 10.7998                           | 0.32888443                                   | 49.61556989                                |
| 0.3785                   | 10.8833                           | 0.327843452                                  | 50.65654769                                |
| 0.3785                   | 10.9753                           | 0.326828553                                  | 51.67144663                                |
| 0.3785                   | 11.079                            | 0.325880891                                  | 52.61910928                                |
| 0.3785                   | 11.2001                           | 0.32509027                                   | 53.40972982                                |
| 0.3785                   | 11.3528                           | 0.324711471                                  | 53.78852881                                |
| 0.3785                   | 11.5795                           | 0.325504806                                  | 52.99519392                                |

Table S7. Trace velocity, sound speed and winds speed for March 15th 2018 at 14:13 JST.
